# Supplementary material for: Effect of a methyl group on the spontaneous resolution of a square-pyramidal coordination compound: crystal packing and conglomerate formation
Source: Royal Society of Chemistry journal article supplement (doi:10.1039/c2ce25497b), 2012-01-01

## *Supporting Information*

### *to the paper entitled*

## **Effect of a methyl group on the spontaneous resolution of a square-pyramidal coordination compound: crystal packing and conglomerate formation**

Apurba Biswas,<sup>a</sup> Carolina Estarella,<sup>b</sup> Antonio Frontera,<sup>b</sup> Pablo Ballester,<sup>c,d</sup> Michael G. B. Drew,<sup>e</sup> Patrick Gamez<sup>\*d,f</sup> and Ashutosh Ghosh<sup>\*a</sup>

### **Table of contents**

---

|                                                                                                   |           |
|---------------------------------------------------------------------------------------------------|-----------|
| <b>Table S1.</b> Summary of the crystallographic data for <b>1</b> ( $\Delta$ enantiomer)         | <b>S2</b> |
| <b>Table S2.</b> Coordination bonds (Å) and angles (°) for <b>1</b> ( $\Delta$ enantiomer)        | <b>S2</b> |
| <b>Figure S1.</b> $\Delta$ enantiomer of [CuL <sup>1</sup> (pic)] ( <b>1</b> )                    | <b>S3</b> |
| <b>Figure S2.</b> UV-Vis spectrum of <b>1-<math>\Delta</math></b> in solution                     | <b>S3</b> |
| <b>Figure S3.</b> Solid-state CD spectrum of the other enantiomer of <b>1-<math>\Delta</math></b> | <b>S3</b> |
| <b>Figure S4.</b> Solution CD spectrum of <b>1</b>                                                | <b>S4</b> |
| <b>Figure S5.</b> Solution CD spectrum of <b>2</b>                                                | <b>S4</b> |
| <b>Figure S6.</b> Solid-state and solution UV-Vis spectra of <b>2</b>                             | <b>S5</b> |

---

**Table S1** Summary of the crystallographic data for **1** ( $\Delta$  enantiomer)

|                                              |                                                                 |
|----------------------------------------------|-----------------------------------------------------------------|
| Formula                                      | C <sub>17</sub> H <sub>21</sub> CuN <sub>3</sub> O <sub>3</sub> |
| Formula weight                               | 378.91                                                          |
| Temperature                                  | 100(2) K                                                        |
| Crystal system                               | orthorhombic                                                    |
| Space group                                  | <i>P</i> 2 <sub>1</sub> 2 <sub>1</sub> 2 <sub>1</sub>           |
| <i>a</i> /Å                                  | 7.3456(5)                                                       |
| <i>b</i> /Å                                  | 11.2047(8)                                                      |
| <i>c</i> /Å                                  | 20.0815(15)                                                     |
| $\alpha$ /°                                  | 90                                                              |
| $\beta$ /°                                   | 90                                                              |
| $\gamma$ /°                                  | 90                                                              |
| <i>V</i> /Å <sup>3</sup>                     | 1652.8(2)                                                       |
| <i>Z</i>                                     | 4                                                               |
| <i>D</i> <sub>calc</sub> /g cm <sup>-3</sup> | 1.523                                                           |
| $\mu$ /mm <sup>-1</sup>                      | 1.342                                                           |
| <i>F</i> (000)                               | 788                                                             |
| <i>R</i> (int)                               | 0.0321                                                          |
| Total Reflections                            | 8722                                                            |
| Flack parameter                              | 0.005(11)                                                       |
| Unique reflections                           | 3607                                                            |
| <i>I</i> > 2 $\sigma$ ( <i>I</i> )           | 3474                                                            |
| <i>R</i> 1, <i>wR</i> 2                      | 0.0281, 0.0727                                                  |

**Table S2** Coordination bonds (Å) and angles (°) for **1** ( $\Delta$  enantiomer)

|             |           |
|-------------|-----------|
| Cu1–O11     | 1.909(1)  |
| Cu1–N19     | 1.983(2)  |
| Cu1–O38     | 1.998(2)  |
| Cu1–N31     | 1.982(2)  |
| Cu1–N22     | 2.325(2)  |
| O11–Cu1–N19 | 95.21(7)  |
| N19–Cu1–O38 | 90.53(7)  |
| O38–Cu1–N31 | 82.08(7)  |
| N31–Cu1–O11 | 93.03(7)  |
| O11–Cu1–N22 | 107.50(7) |
| N19–Cu1–N22 | 83.30(8)  |
| O38–Cu1–N22 | 98.08(7)  |
| N31–Cu1–N22 | 94.08(7)  |

**Figure S1** Molecular structure of the  $\Delta$  enantiomer of compound **1**

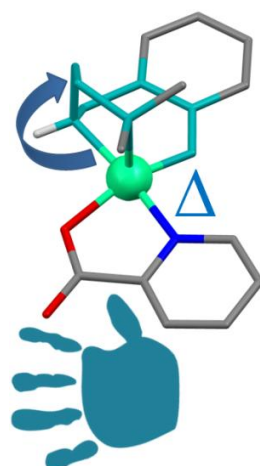

**Figure S2** UV-Vis spectrum of a millimolar methanolic solution of **1**

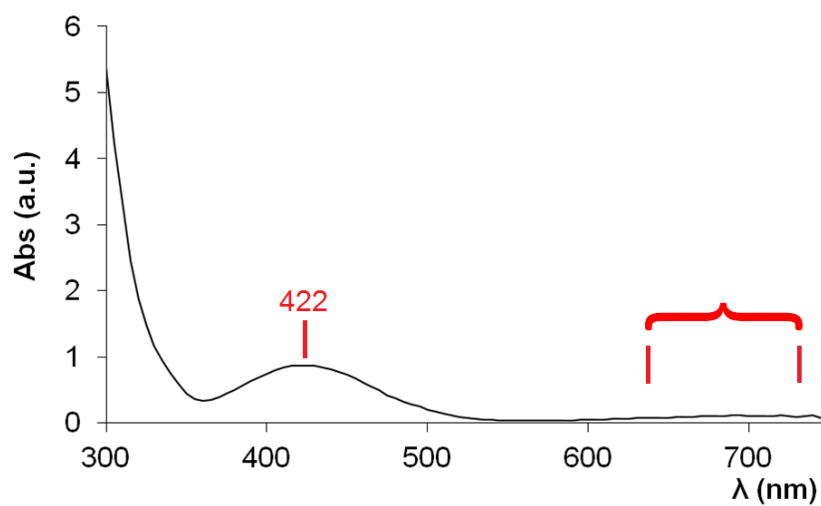

**Figure S3.** Solid-state CD spectrum of the other enantiomer of **1- $\Delta$**

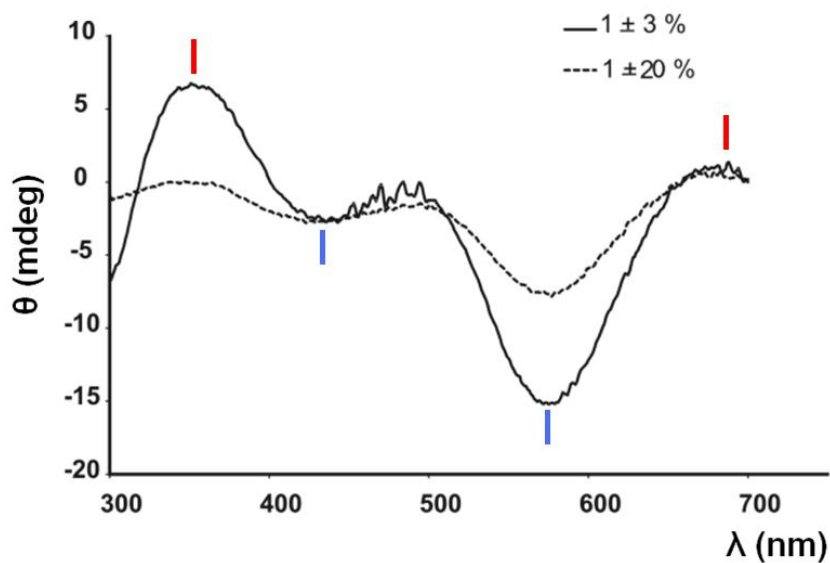

**Figure S4** Solution CD spectrum of **1** ( $1 \times 10^{-3}$  M in methanol)

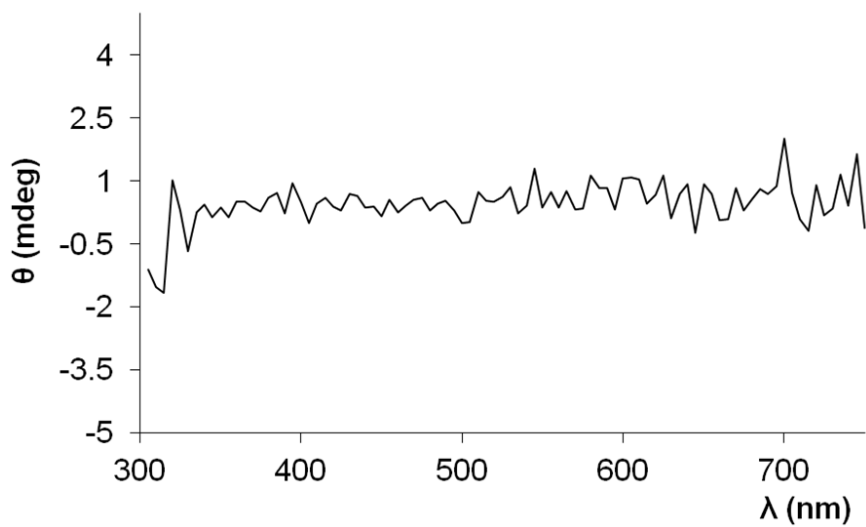

**Figure S5.** Solution CD spectrum of **2** ( $1 \times 10^{-3}$  M in methanol)

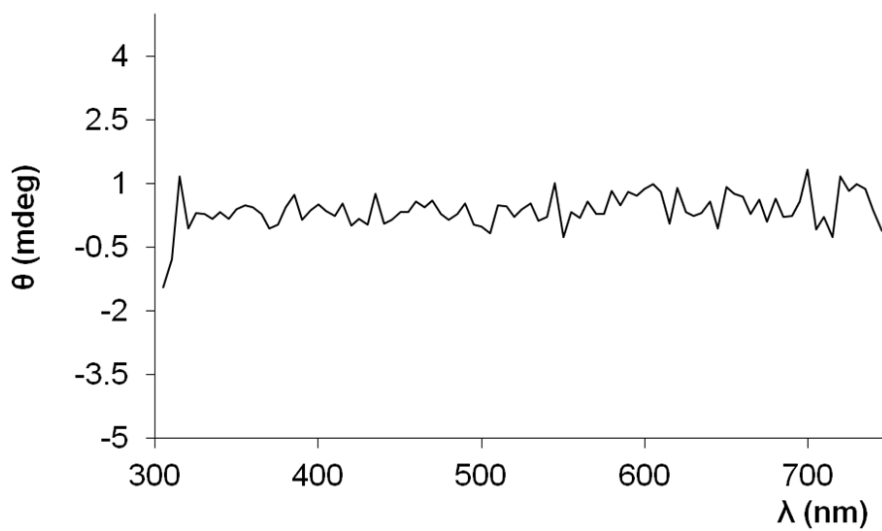

**Figure S6.** Solution (A) and solid-state (B) UV-Vis spectra of **2**

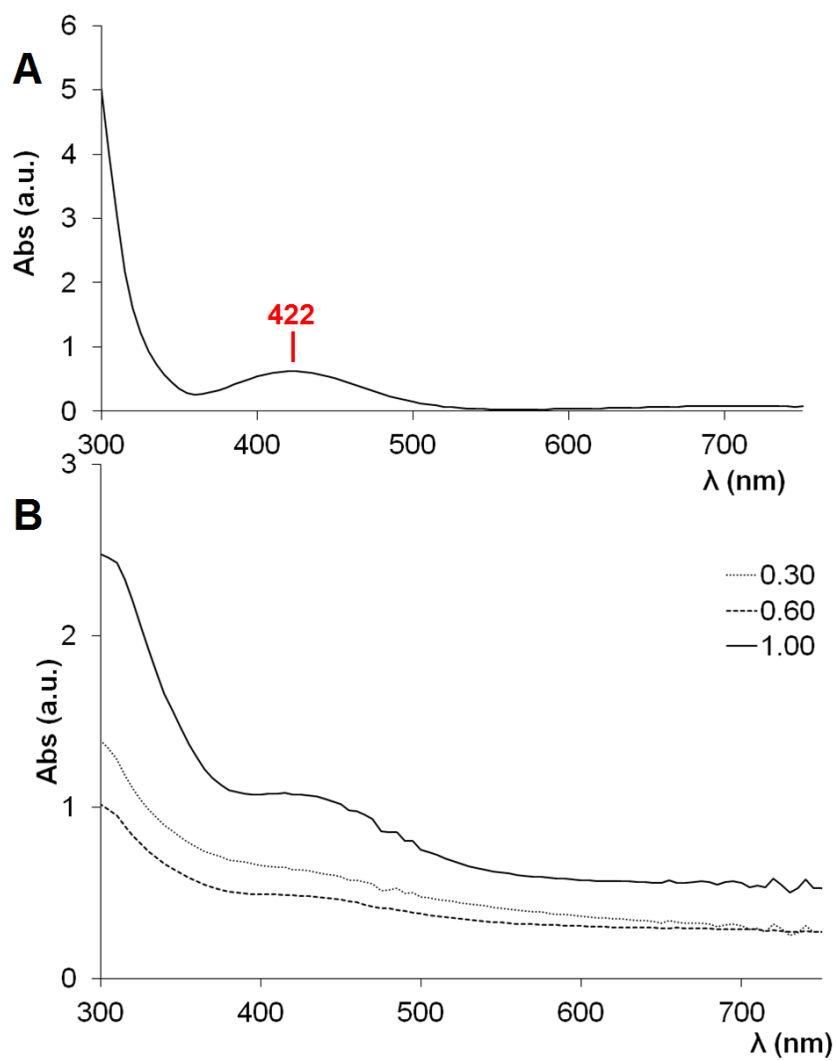

Supplement: c2ce25497b.pdf [file c2ce25497b.pdf]
